# Supplementary material for: Uniting activity design principles of anode catalysts for direct liquid fuel cells
Source: Royal Society of Chemistry journal article supplement (doi:10.1039/d4ey00100a), 2024-01-01
Supplement: d4ey00100a1.pdf [file d4ey00100a1.pdf]

Supplementary Information

## Uniting Activity Design Principles of Anode Catalysts for Direct Liquid Fuel Cells

Daniel J. Zheng,<sup>a†</sup> Jiayu Peng,<sup>\*a†</sup> Kaylee McCormack,<sup>c</sup> Hongbin Xu,<sup>a</sup> Jin Soo Kang,<sup>bc‡</sup> Zhenshu Wang,<sup>b</sup> Zhichu Ren,<sup>a</sup> Ju Li,<sup>ad</sup> Yuriy Román-Leshkov,<sup>\*b</sup> and Yang Shao-Horn<sup>\*ace</sup>

<sup>a</sup> *Department of Materials Science and Engineering, Massachusetts Institute of Technology, Cambridge, MA 02139*

<sup>b</sup> *Department of Chemical Engineering, Massachusetts Institute of Technology, Cambridge, MA 02139*

<sup>c</sup> *Research Laboratory of Electronics, Massachusetts Institute of Technology, Cambridge, MA 02139*

<sup>d</sup> *Department of Nuclear Science and Engineering, Massachusetts Institute of Technology, Cambridge, MA 02139*

<sup>e</sup> *Department of Mechanical Engineering, Massachusetts Institute of Technology, Cambridge, MA 02139*

† Denotes equal contribution.

‡ Present address: Department of Energy Systems Engineering, Seoul National University, Seoul 08826, Republic of Korea

Corresponding Authors:

\*Jiayu Peng (jypeng@mit.edu)

\*Yuriy Román-Leshkov (yroman@mit.edu)

\*Yang Shao-Horn (shaohorn@mit.edu)

### Supplementary Note 1. Calculation of thermodynamic values for liquid fuels

The thermodynamic values of liquid fuels were calculated from the oxidation reaction and values from standard tables from the NIST Standard Reference Database<sup>1</sup> and chemical handbooks.<sup>2-4</sup>.

The standard Gibbs free energy of reaction  $\Delta G_{r,i}^\circ$  of species  $i$  at 25 °C was calculated from the oxidation half-reaction through

$$\Delta G_{r,i}^\circ = \sum_j \nu_j \Delta_f G_i^\circ$$

where  $\nu_i$  is the stoichiometric coefficient for species  $i$  and  $\Delta_f G_i^\circ$  is the standard Gibbs free energy of formation for species  $i$ .

The standard oxidation potential  $E^\circ$  was calculated using the relation

$$E_i^\circ = -\frac{\Delta G_{r,i}^\circ}{-zF}$$

where  $z$  is the number of electrons transferred per mole of liquid fuel oxidation and  $F$  is Faraday's constant (96485 C mol<sup>-1</sup>).

The overall cell potential was calculated assuming that the oxygen reduction reaction (ORR) occurs at the cathode with the following equation,

$$E_{cell,i}^\circ = E_{ORR}^\circ - E_i^\circ$$

The specific energy of liquid fuel  $i$  ( $S_i$ ) was then calculated using

$$S_i = \frac{-zFE_i^\circ}{M_i}$$

where  $M_i$  is the molar mass of liquid fuel  $i$ . Using the density of liquid fuel  $i$  ( $\rho_i$ ) at room temperature and atmospheric pressure, the energy density  $D_i$  was calculated by

$$D_i = \rho_i S_i$$

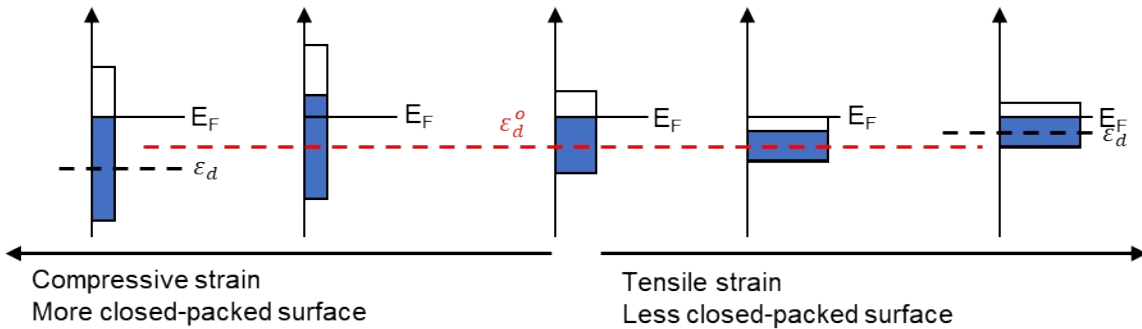

**Figure S1.** Schematic demonstrating the shifts in d-band center due to changes in the electronic structure of a metal surface.

## References

1. *NIST Chemistry WebBook, NIST Standard Reference Database Number 69.* (National Institute of Standards and Technology, 2018).
2. *CRC Handbook of Chemistry and Physics.* (CRC Press, 2011).
3. *Perry's Chemical Engineers' Handbook.* (McGraw-Hill Education, 2008).
4. *Chemical Properties Handbook: Physical, Thermodynamics, Environmental, Transport, Safety and Health Related Properties for Organic and Inorganic Chemicals.* (McGraw-Hill Education, 1999).
